# Supplementary material for: Compensatory combination of romidepsin with gemcitabine and cisplatin to effectively and safely control urothelial carcinoma
Source: PubMed Central journal article supplement (PMC7374627; doi:10.1038/s41416-020-0877-8), 2020-05-11

## Supplementary Tables

**Supplementary Table S1: Concentrations of agents used in vitro studies.**

| Cell line | Gemcitabine<br>( $\mu\text{M}$ ) | Romidepsin<br>(nM) | Cisplatin<br>( $\mu\text{M}$ ) | NAC<br>(mM) | U0126<br>( $\mu\text{M}$ ) | ML171<br>( $\mu\text{M}$ ) |
|-----------|----------------------------------|--------------------|--------------------------------|-------------|----------------------------|----------------------------|
| J82       | 0.4                              | 1                  | 3                              | 5           | 2.5                        | 1                          |
| J82-Ras   | 0.2                              | 0.5                | 3                              | 5           | 2.5                        | 1                          |
| SW780     | 0.4                              | 0.7                | 10                             | 5           | 2.5                        | 1                          |
| T24       | 0.2                              | 0.4                | 3                              | 5           | 2.5                        | 1                          |

**Supplementary Table S2: Treatment dosage and schedule for in vivo studies.**

| Regimen             | Drug dosage                                                             | Schedule                                    |
|---------------------|-------------------------------------------------------------------------|---------------------------------------------|
| Gem plus<br>Cis     | 20 mg/kg of Gem in PBS, IP<br>5 mg/kg of Cis in PBS, IP                 | Day 1, 3, 6, 9 & 12<br>Day 2, 4, 7, 10 & 13 |
| Rom +Cis            | 1 mg/kg of Rom+ 5 mg/kg of Cis in PBS, IP                               | Day 1, 3, 6, 9 & 12                         |
| Gem plus<br>Rom+Cis | 20 mg/kg of Gem in PBS, IP<br>1 mg/kg of Rom+ 5 mg/kg of Cis in PBS, IP | Day 1, 3, 6, 9 & 12<br>Day 2, 4, 7, 10 & 13 |

**Gem:** Gemcitabine; **Rom:** Romidepsin; **Cis:** Cisplatin

**Supplementary Table S3: Specific antibodies used in immunoblotting.**

| Antibody       | Company | Catalogue number | Dilution | Blocking solution |
|----------------|---------|------------------|----------|-------------------|
| H-RAS          | SCB     | SC-520           | 1:500    | 5% NDM            |
| MOX1 (Nox-1)   | SCB     | SC-518023        | 1:500    | 5% NDM            |
| p-MEK kinase-1 | SCB     | SC-13020         | 1:1000   | 5% BSA            |
| MEK kinase-1   | SCB     | SC-49449         | 1:1000   | 5% NDM            |
| p-ERK          | SCB     | SC-7383          | 1:500    | 5% BSA            |
| ERK-2          | SCB     | SC-154           | 1:1000   | 5% NDM            |
| Actin          | SCB     | SC-1616          | 1:500    | 5% NDM            |
| PARP           | CST     | 9542S            | 1:1000   | 5% NDM            |
| BiP            | CST     | 3177S            | 1:1000   | 5% NDM            |

**SCB:** Santa Cruz Biotechnology; **CST:** Cell Signaling Technology, **NDM:** Nonfat dried milk; **BSA:** Bovine serum albumin

**Supplementary Table S4: Standard protocols of clinical anti-cancer regimens converted for mouse use.**

| Regimen         | Cancer type                         | Drug dosage in humans                                    | Drug dosage converted for mouse study | Schedule for humans    |
|-----------------|-------------------------------------|----------------------------------------------------------|---------------------------------------|------------------------|
| Gem plus<br>Cis | UC                                  | Gem, 1000 mg/m <sup>2</sup><br>Cis, 70 mg/m <sup>2</sup> | Gem, 324 mg/kg<br>Cis, 23 mg/kg       | Day 1, 8 & 15<br>Day 2 |
| Rom             | Lymphoma and Refractory solid tumor | Rom, 8-17.5 mg/m <sup>2</sup>                            | Rom, 5 mg/kg                          | Day 1, 8 & 15          |

**UC:** Urothelial carcinoma; **Gem:** gemcitabine; **Rom:** romidepsin; **Cis:** cisplatin

## Supplementary Figure Legends

### **Supplementary Figure S1. Densitometric analysis of Mek, Erk, and Nox levels.** As

performed in **Fig. 1g**, J82 and J82-Ras cells were treated with Rom, Cis, and/or Gem at their IC<sub>10</sub> doses for 24 h. Cell lysates were prepared and analyzed by immunoblotting using specific antibodies to detect levels of phosphorylated Mek1/2 (p-Mek1/2), Mek1/2, phosphorylated Erk1/2 (p-Erk1/2), Erk1/2, and Nox-1, with  $\beta$ -actin as a control, and these levels were quantified by densitometry. Levels of specific phosphorylation of Mek1/2 (**a**, p-Mek/Mek) and Erk1/2 (**b**, p-Erk/Erk) were calculated by normalizing the levels of p-Mek1/2 and p-Erk1/2 with the levels of Mek1/2 and Erk1/2, respectively, then the level was set in untreated control cells as 1 (X, arbitrary unit). Levels of Nox-1 (**c**, Nox-1/actin) were calculated by normalizing with the level of  $\beta$ -actin and the level set in control cells as 1 (X, arbitrary unit). Columns, mean of triplicates; bars, SD. The *p* value was adjusted for multiple comparisons by using the Simes method. Statistical significance, indicated by \**p* < 0.05, \*\**p* < 0.01, \*\*\**p* < 0.001. All results are representative of three independent experiments.

### **Supplementary Figure S2. H-Ras and Erk in J82 and J82-Ras cells.** (a) Cell lysates of J82

and J82-Ras cells were prepared and analyzed by immunoblotting using specific antibodies to detect levels of H-Ras, with  $\beta$ -actin as a control. Levels of H-Ras (H-Ras/actin) were calculated by normalizing with the level of  $\beta$ -actin and the level set in control cells as 1 (X, arbitrary unit).

(b) J82 and J82-Ras cells were treated with Gem+Rom+Cis (G+R+C) for 24 h. Cell lysates were prepared and analyzed by immunoblotting using specific antibodies to detect levels of phosphorylated phosphorylated Erk1/2 (p-Erk1/2) and Erk1/2, with  $\beta$ -actin as a control. These

levels were quantified by densitometry. Levels of specific phosphorylation of Erk (p/Erk) were calculated by normalizing the levels of p-Erk1/2 with the levels of Erk1/2, respectively, then the level was set in untreated control cells as 1 (X, arbitrary unit). All results are representative of three independent experiments.

**Supplementary Figure S3. Rom+Cis+Gem synergistically induced death and suppressed drug resistance in SW780 cells.** SW780 cells were treated with Rom, Cis, and/or Gem at their IC<sub>10</sub> doses in the absence or presence of NAC, U0126, or ML171. **(a-1)** Cell viability was determined, and relative cell viability was normalized by the value determined in untreated counterpart cells, set as 100%. **(a-2)** Combined effects **(a-1)** were determined to reveal combination indices <1 for synergistic effects. **(b)** Cell lysates were prepared and analyzed by immunoblotting using specific antibodies to detect levels of p-Erk1/2, Erk1/2, and Nox-1, with  $\beta$ -actin as a control, and these levels were quantified by densitometry. Levels of specific phosphorylation of Erk1/2 (p/Erk) were calculated by normalizing the level of p-Erk1/2 with the level of Erk1/2, then the level set in control cells as 1 (X, arbitrary unit). Levels of Nox-1 (Nox/actin) were calculated by normalizing with the level of  $\beta$ -actin and the level set in control cells as 1 (X). **(c & g)** Relative ROS levels were measured and normalized by the level determined in untreated counterpart cells, set as 1 (X). **(d)** Relative caspase-3/7 activity was determined and normalized by cell viability, and then the relative values were normalized by the value determined in untreated counterpart cells, set as 1 (X, arbitrary unit). **(e)** DNA oxidation was measured by an Fpg-modified comet assay and normalized by the value of average tail moment determined in untreated control cells, set as 1 (X). **(f)** DNA damage was measured by an alkaline comet assay and normalized by the value of average tail moment determined in

untreated control cells, set as 1 (X). **(h)** Apoptotic cell population (%) was measured by flow cytometry with an annexin-V-FITC apoptosis detection kit. **(i)** Clonogenic survival was measured by a clonogenic assay. Relative colony formation was normalized by the value determined in untreated counterpart cells, set as 100%. **(j)** GSH content was determined and relative GSH level was normalized by the value determined in untreated counterpart cells, set as 100%. Columns, mean of triplicates; bars, SD. The  $p$  value was adjusted for multiple comparisons by using the Simes method. Statistical significance is indicated  $*p < 0.05$ ,  $**p < 0.01$ ,  $***p < 0.001$ . All results are representative of three independent experiments.

**Supplementary Figure S4. BiP induced by Rom+Cis+Gem in T24 and SW780 cells.** **(a)** T24 and **(b)** SW780 cells were treated with Gem+Rom+Cis (G+R+C) for 48 h. Cell lysates were prepared and analyzed by immunoblotting using specific antibodies to detect levels of BiP, with  $\beta$ -actin as a control, and these levels were quantified by densitometry. Levels of BiP (BiP/actin) were calculated by normalizing with the level of  $\beta$ -actin and the level set in control cells as 1 (X, arbitrary unit). All results are representative of three independent experiments.

**Supplementary Figure S5. TUNEL assay.** **(a)** J82-Ras cultures were treated with Rom+Cis+Gem for 24 h, rinsed, and fixed with 3.7% formaldehyde. **(b)** Paraffin embedded tissues were deparaffinized and rehydrated. Then, cultures and tissues were examined with the TACS 2 TdT-DAB In Situ Apoptosis Detection Kit (Trevigen, MD, USA) to detect apoptotic cells. Samples were counter-stained by methyl green. Images were taken at 400x; scale bar, 50  $\mu$ m. Black arrows indicate apoptotic cells.

# Supplementary Figure S1

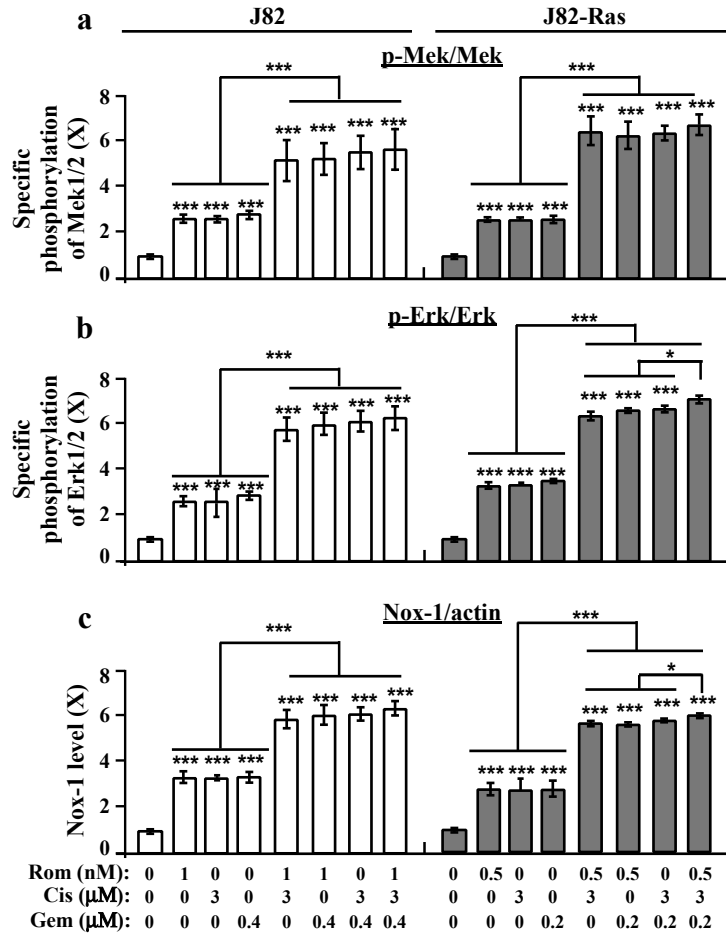

## Supplementary Figure S2

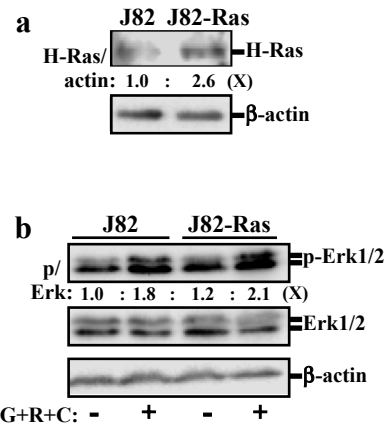

Supplementary Figure S3

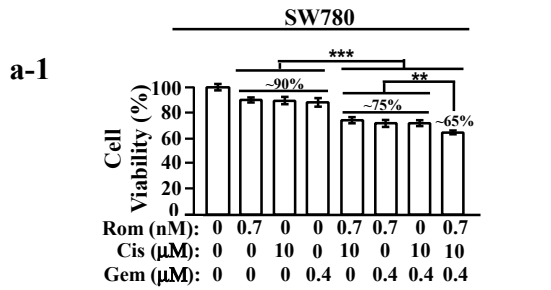

**a-2**

Combination indices

| Rom+Cis | Rom+Gem | Cis+Gem | Rom+Cis+Gem |
|---------|---------|---------|-------------|
| 0.64    | 0.59    | 0.52    | 0.93        |

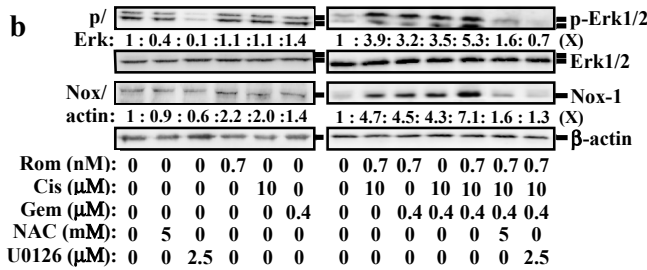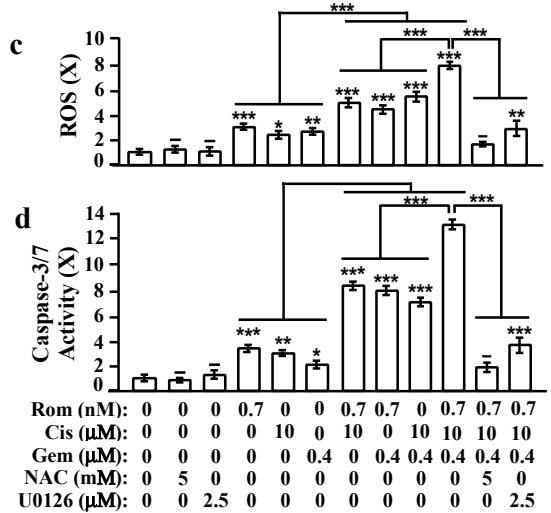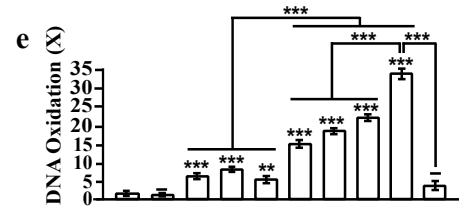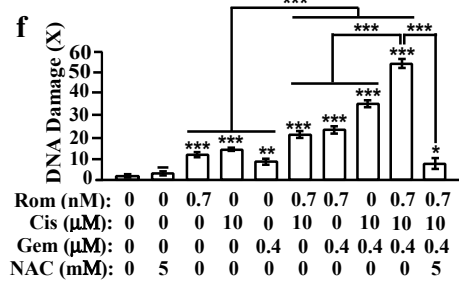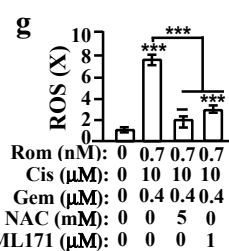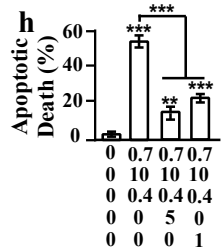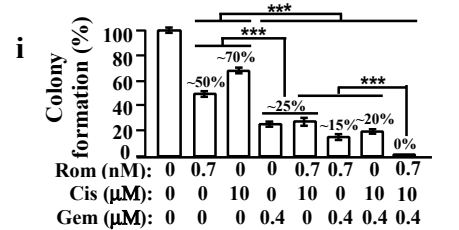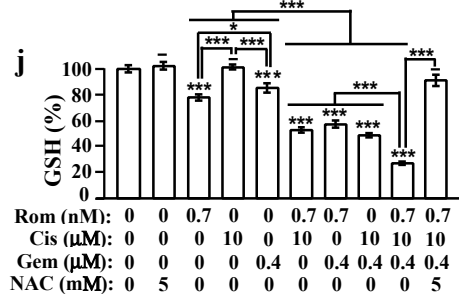

## Supplementary Figure S4

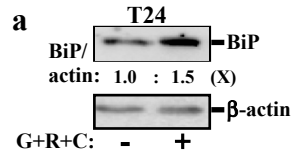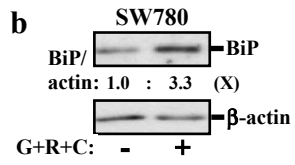



# Supplementary Figure S5

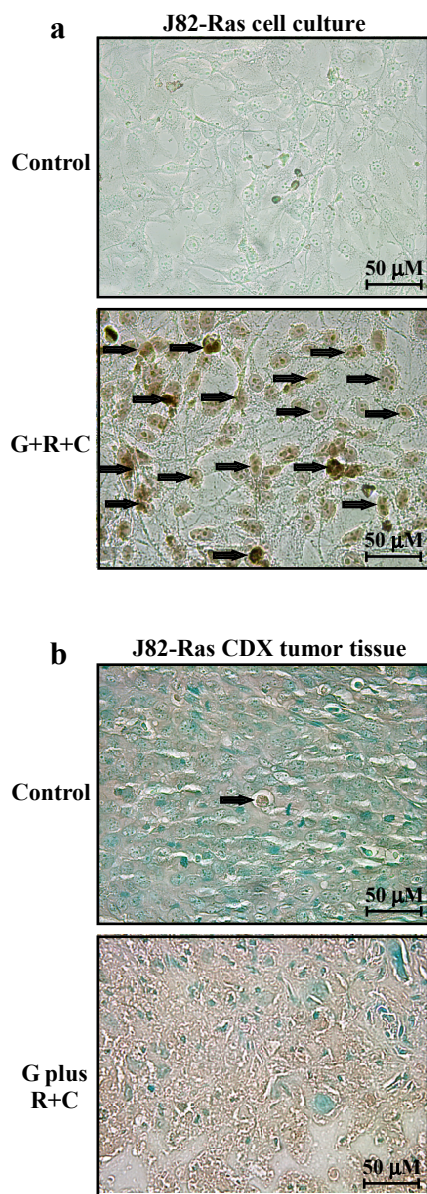

Supplement: 41416_2020_877_MOESM1_ESM.pdf [file 41416_2020_877_MOESM1_ESM.pdf]
